# Supplementary material for: Electrochemical synthesis of high entropy nanoparticles and the exploration of the Pd–Ag–Au composition space for the oxygen reduction reaction
Source: Royal Society of Chemistry journal article supplement (doi:10.1039/d5fd00095e), 2025-07-08
Supplement: d5fd00095e2.zip [file d5fd00095e2.zip]

## Sheet: Sheet1
Sample		Compisition ratio by SEM-EDS			E at normalized current density 1mA/cm2, 1600rpm	Coverage by area %	Deposition bath						Deposition
sample number	sample name	Pd	Ag	Au			Electrolyte	Pd/ uM	Ag/ uM	Au/ uM	Au Precursor	NH3/uL	Deposition method	Current or Potentials	Deposition time/s	Potential outlier
1	0531 GC1	31	69	0	0.879	29	0,1M Na2SO4	300	20			20	Galvanostatic	30 uA	120
2	0531 GC2	71	29	0	0.907	40						20		60 uA	60
3	0531 GC3	21	79	0	0.778	33						20		30 uA	120	X
4	0531 GC4	73	27	0	0.902	46						20		60 uA	60	X
5	0523 GC5	0	89	11	0.836	38	0,1M Na2SO4	300	100	50	KAu(CN)2	20	Galvanostatic	30 uA	240
6	0523 GC6	0	80	20	0.828	39						20		60 uA	120
7	0610 GC3	66	30	4	0.9	37	0,1M Na2SO4	250	15	5	KAu(CN)2	20	Galvanostatic	70 uA	45	X
8	0610 GC4	86	8	3	0.9	27						20		90 uA	30	X
9	0610 GC5	60	30	10	0.894	48						20	Pulse protocol	En/Ed -0,7/-0,65v; Er 0,3V; 0,05/0,25s	240	X
10	0705 GC3	11	70	19	0.884	6.9	0,1M Na2SO4	300	15	5	KAu(CN)2	20	Galvanostatic	45 uA	90
11	0705 GC4	29	55	16	0.9	11.5						20		60 uA	70
12	0705 GC5	40	45	15	0.916	14.4						20		60 uA	70
13	0705 GC6	22	61	17	0.881	8.5						20	Pulse protocol	En/Ed -0,65/-0,6v; Er 0V; 0,01/0,01s	70
14	0709 GC1	82	17	1	0.919	51	0,1M Na2SO4	300	20	10	Na3Au(S2O3)2	20	Potentiostatic	-0,65 V	60
15	0709 GC2	71	25	4	0.908	43						20	Pulse protocol	En/Ed -0,65/-0,65v; Er 0 V; 0,05/0,05s	90
16	0709 GC3	85	13	2	0.923	43						20		En/Ed -0,7/-0,7v; Er 0 V; 0,05/0,05s	60
17	0709 GC4	76	22	2	0.897	33						20		En/Ed -0,7/-0,65v; Er 0 V; 0,05/0,05s	60	X
18	0710 GC5	100	0	0	0.943	21	0,1M Na2SO4	300	-			20	Potentiostatic	-0,65 V	35
19	0710 GC6	0	100	0	0.799	24		300	20			20	Galvanostatic	20 uA	180
20	0710 GC9	13	87	0	0.808	16						20	Galvanostatic	60 uA	70	X
21	0710 GC10	40	60	0	0.912	16						20	Pulse protocol	En/Ed -0,65/-0,6v; Er 0V; 0,05/0,05s	90
22	0718 GC1	100	0	0	0.944	49	0,1M Na2SO4	400				20	Pulse protocol	En/Ed -0,65/-0,6v; Er 0V; 0,05/0,05s	80
23	0718 GC2	100	0	0	0.943	39						20		En/Ed -0,65/-0,6v; Er 0V; 0,05/0,05s	80
24	0718 GC3	100	0	0	0.942	52						20		En/Ed -0,7/-0,65v; Er 0V; 0,05/0,05s	40
25	0718 GC4	100	0	0	0.942	48						20		En/Ed -0,7/-0,65v; Er 0V; 0,05/0,05s	40
26	0718 GC5	100	0	0	0.948	51						20		En/Ed -0,7/-0,65v; Er 0V; 0,05/0,05s	40
27	0718 GC6	75	0	25	0.951	38	0,1M Na2SO4	400	-	100	Na3Au(S2O3)2	20	Potentiostatic	-0,6v	90
28	0718 GC7	63	0	37	0.944	27						20	Pulse protocol	En/Ed -0,6/-0,55v; Er 0V; 0,05/0,05s	90
29	0718 GC8	77	0	23	0.951	45						20		En/Ed -0,7/-0,65v; Er 0V; 0,05/0,05s	60
30	0718 GC9	66	0	34	0.946	24						20	Galvanostatic	70uA	60
31	0718 GC10	77	0	23	0.948	28						20		100uA	40
32	0802 GC1	100	0	0	0.944	35	0,1M Na2SO4	300				20	Potentiostatic	-0,65 V	50
33	0802 GC2	100	0	0	0.937	52						20	Pulse protocol	En/Ed -0,65/-0,6v; Er 0V; 0,05/0,05s	70	X
34	0802 GC3	100	0	0	0.945	51						20		En/Ed -0,65/-0,6v; Er 0V; 0,015/0,015s	70
35	0802 GC4	92	0	8	0.953	28	0,1M Na2SO4	300		100	KAu(CN)2	20	Potentiostatic	-0,65 V	30
36	0802 GC5	45	0	55	0.937	42						20	Galvanostatic	70uA	60
37	0802 GC6	40	0	60	0.928	38						20		50uA	80
38	0802 GC7	52	0	48	0.95	39						20	Pulse protocol	En/Ed -0,65/-0,6v; Er 0V; 0,05/0,05s	90
39	0802 GC8	61	0	39	0.95	29						20		En/Ed -0,7/-0,65v; Er 0V; 0,05/0,05s	60
40	0805 GC1	0	74	26	0.76	50	0,1M Na2SO4		200	200	Na3Au(S2O3)2	20	Potentiostatic	-0,6 V	120
41	0815 GC1	0	0	100	0.811	13				300	Na3Au(S2O3)2	20	Galvanostatic	50uA	70
42	0815 GC2	0	0	100	0.804	14						20		70uA	50
43	0815 GC3	0	0	100	0.72	8						20		70uA	30	X
44	0815 GC4	45	0	55	0.932	21		100		300	Na3Au(S2O3)2	20		50uA	60
45	0815 GC5	55	0	45	0.924	14						20	Potentiostatic	-0,65V	40	X
46	0815 GC6	58	0	42	0.914	12						20	Potentiostatic	-0,75V	35	X
47	0818 GC1	89	11	0	0.895	13		225	15			20	Potentiostatic	-0,6V	50	X
48	0818 GC2	88	12	0	0.885	14						20	Potentiostatic	-0,6V	40	X
49	0818 GC3	86	14	0	0.917	21						20	Pulse protocol	En/Ed -0,7/-0,65v; Er 0V; 0,05/0,05s	60
50	0818 GC4	86	14	0	0.92	21						20	Pulse protocol	En/Ed -0,7/-0,65v; Er 0V; 0,05/0,05s	60
51	0818 GC5	10	90	0	0.81	35						20	Galvanostatic	-30uA	100	X
52	0827 GC1	100	0	0	0.942	56	NaCl pH3,7	40			HAuCl4	/	Potentiostatic	-0,4V	100	X
53	0827 GC3	75	0	25	0.932	43		40		20		/	Potentiostatic	-0,4V	70	X
54	0827 GC4	61	0	39	0.915	35		40		20		/	Pulse protocol	En/Ed -0,45/-0,4v; Er 0,5V; 0,01s/	60	X
55	0827 GC5	56	0	44	0.926	46		40		20		/		En/Ed -0,45/-0,4v; Er 0,5V; 0,01s/	90	X
56	0827 GC6	47	0	53	0.925	44		40		40		/		En/Ed -0,45/-0,4v; Er 0,5V; 0,01s/	60	X
57	0904 GC1	100	0	0	0.93	20	NaCl pH3,7	40		0		/	Pulse protocol	En/Ed -0,5/-0,45v; Er 0,4V; 0,01s/	150	X
58	0904 GC2	100	0	0	0.928	30						/		En/Ed -0,45/-0,4v; Er 0,4V; 0,015s/	200	X
59	0904 GC3	53	0	47	0.901	26				20	HAuCl4	/		En/Ed -0,45/-0,4v; Er 0,6V; 0,01s/	90	X
60	0904 GC4	38	0	62	0.893	35				52		/		En/Ed -0,45/-0,4v; Er 0,6V; 0,01s/	60	X
61	0904 GC5	35	0	65	0.868	36				72		/		En/Ed -0,45/-0,4v; Er 0,6V; 0,01s/	50	X
62	0904 GC6	30	0	70	0.918	20				72		/		En/Ed -0,4/-0,35v; Er 0,6V; 0,01s/	40	X
63	0904 GC7	86	14	0	0.858	43	0,1M Na2SO4	225	20			20	Potentiostatic	-0,6V	90	X
64	0904 GC8	89	11	0	0.888	42						20		-0,65V	60	X
65	0904 GC9	63	37	0	0.9	43						20	Pulse protocol	En/Ed -0,7/-0,65v; Er 0V; 0,05s/	100	X
66	0904 GC10	29	71	0	0.9	42						20		En/Ed -0,65/-0,6v; Er 0,6V; 0,05s/	150	X
67	0910 GC1	61	15	24	0.895	43	0,1M Na2SO4	200	20	60	Na3Au(S2O3)2	20	Potentiostatic	-0,65V	40
68	0910 GC2	57	15	28	0.889	30						20	Pulse protocol	En/Ed -0,7/-0,65v; Er 0V; 0,05s/	90
69	0910 GC3	54	19	27	0.89	37						20		En/Ed -0,65/-0,6v; Er 0,6V; 0,05s/	120
70	0910 GC4	57	17	25	0.898	33						20		En/Ed -0,75/-0,7v; Er 0,6V; 0,05s/	60
71	0910 GC5	60	14	26	0.89	39						20		En/Ed -0,7/-0,65v; Er 0,6V; 0,05s/	60
72	0917 GC1	69	17	14	0.935	43	0,1M Na2SO4	240	5	20	Na3Au(S2O3)2	20	Pulse protocol	En/Ed -0,7/-0,65v; Er 0V; 0,05s/	85
73	0917 GC2	70	13	17	0.922	50						20		En/Ed -0,65/-0,6v; Er 0V; 0,05s/	120
74	0917 GC3	66	10	24	0.921	44				40		20		En/Ed -0,65/-0,6v; Er 0V; 0,05s/	120
75	0917 GC4	70	9	21	0.934	26						20		En/Ed -0,7/-0,65v; Er 0V; 0,05s/	85
76	0917 GC5	68	8	25	0.941	28				60		20		En/Ed -0,7/-0,65v; Er 0V; 0,05s/	85
77	0917 GC6	64	7	28	0.92	46						20		En/Ed -0,65/-0,6v; Er 0V; 0,05s/	120
78	0924 GC1	86	8	6	0.953	49	0,1M Na2SO4	240	2	10	Na3Au(S2O3)2	20	Pulse protocol	En/Ed -0,7/-0,65v; Er 0V; 0,05s/	70
79	0924 GC2	86	7	8	0.956	40						20			70
80	0924 GC3	63	8	29	0.948	53		240	4	120		20			50
81	0930 GC1	50	8	42	0.92	54	0,1M Na2SO4	120	10	120		20		En/Ed -0,7/-0,65v; Er 0V; 0,05s/	70
82	0930 GC2	49	8	41	0.909	35									50
83	0930 GC3	42	6	52	0.931	34		120	10	240		20			50
84	0930 GC4	43	6	51	0.924	35									70
85	0930 GC5	47	41	12	0.86	31		120	30	20		20			70
86	0930 GC6	49	40	11	0.847	31									50
87	0930 GC7	34	59	7	0.853	37		120	60	20		20			50
88	0930 GC8	39	54	7	0.854	28									70
89	1007 GC1	8	82	10	0.828	38		30	120	30		20		En/Ed -0,7/-0,65v; Er 0V; 0,05s/	40
90	1007 GC2	8	83	9	0.821	40									50
91	1007 GC3	15	59	26	0.831	45		40	120	120		20			30
92	1007 GC4	13	58	30	0.834	43									45
93	1007 GC5	21	15	63	0.875	34		20	10	160		20			60
94	1007 GC6	20	16	64	0.875	43									80
95	1007 GC7	20	32	48	0.878	54		30	45	160		20			50
96	1007 GC8	17	32	51	0.881	49									80
97	1014 GC1	36	41	23	0.88	36		120	60	90		20		En/Ed -0,7/-0,65v; Er 0V; 0,05s/	40	X
98	1014 GC2	36	40	24	0.894	30									55
99	1014 GC3	18	9	73	0.887	27		20	3	160		20			65	X
100	1014 GC4	20	6	73	0.911	36									90
101	1014 GC6	42	56	2	0.885	32		200	30	5		20			60
102	1014 GC7	46	52	2	0.866	38									50
103	1014 GC8	31	67	2	0.89	45		200	150	5		20			30
104	1014 GC9	28	71	1	0.87	45									20
105	1017 GC1	30	54	16	0.82	38		120	100	60		20			30
106	1017 GC3	37	33	30	0.889	45		120	60	120		20			30
107	1017 GC4	37	33	30	0.887	43									30
